# Supplementary material for: Individual behavioral profiling as a translational approach to assess treatment efficacy in an animal model of post-traumatic stress disorder
Source: PubMed Central journal article supplement (PMC9815535; doi:10.3389/fnins.2022.1071482), 2022-12-22
Supplement: Image_1.pdf [file Image_1.pdf]

Supplementary Material

1 Supplementary Figures

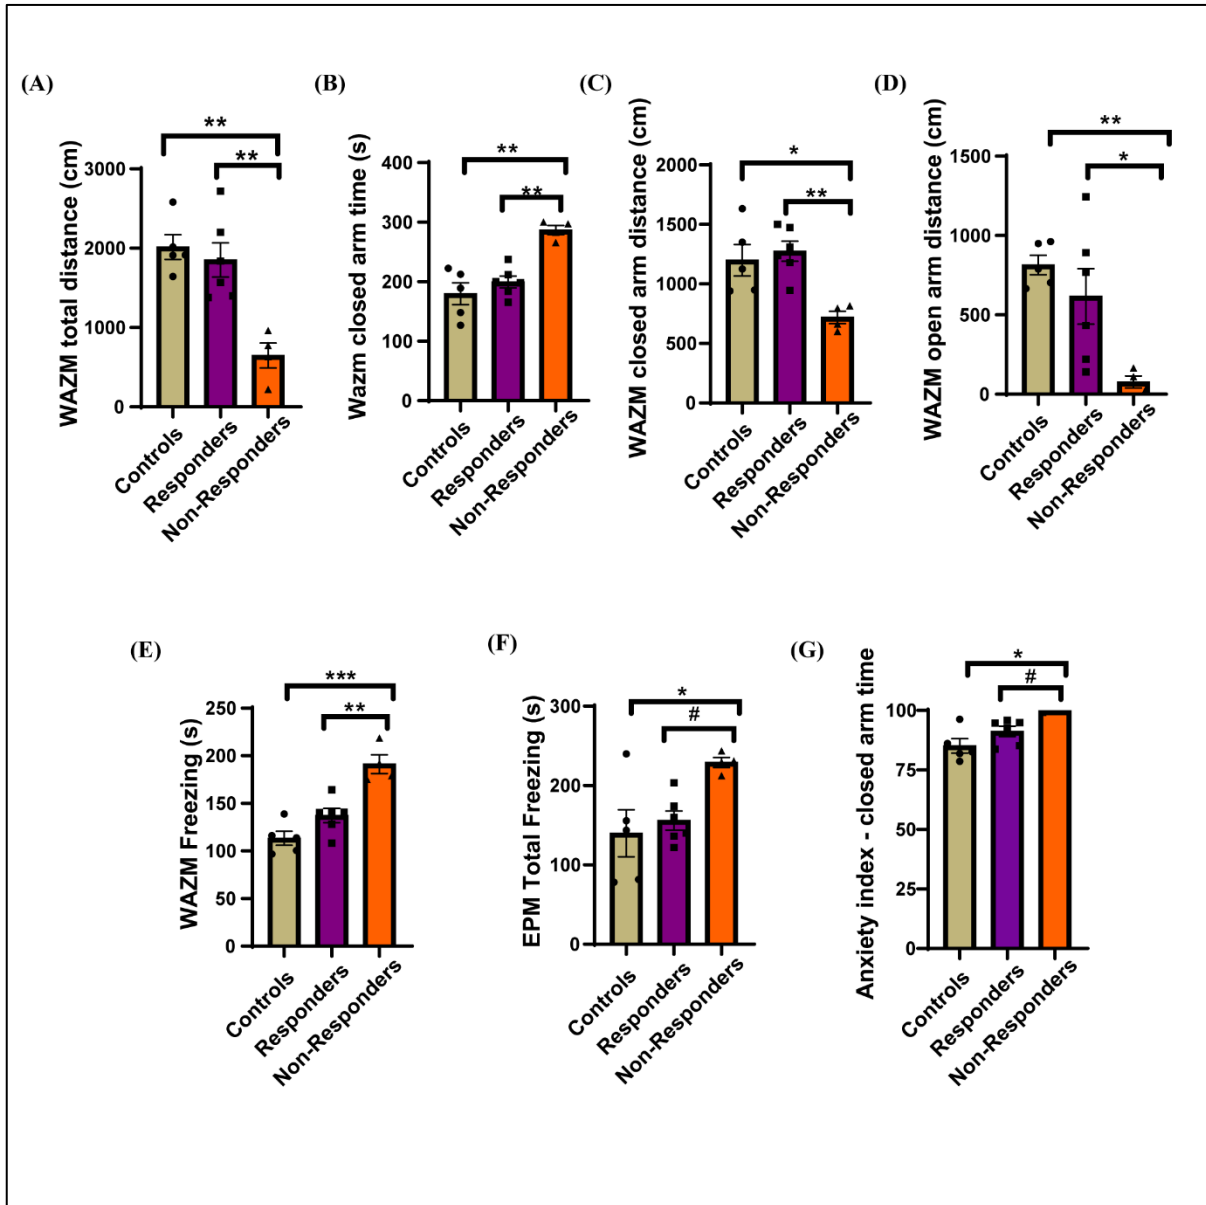

**Supplementary Figure 1.** Average group effect of *controls*, treatment *responders* and *non-responders* used in western blot experiments on behavioural parameters of WAZM and EPM. (A) Total distance travelled in WAZM by the *non-responders* was the least while *responders* and *control* travelled similar distance [Ordinary one-way ANOVA ( $F_{(2,12)} = 13.51$ ,  $p = 0.0008$ ); Bonferroni's post hoc test  $p^{**} < 0.001$ ]. (B) Time spent in the WAZM closed arms was the highest by the *non-responders* but

*responders* and *controls* spent similar time [Ordinary one-way ANOVA ( $F_{(2,12)} = 16.05$ ,  $p = 0.0004$ ); Bonferroni's post hoc test  $p^{**} < 0.01$ ,  $p^{***} < 0.0001$ ]. (C) Distance travelled in the closed arms was the least by *non-responders* but *responders* and *controls* traversed similar distance [Ordinary one-way ANOVA ( $F_{(2,12)} = 8.317$ ,  $p = 0.0054$ ); Bonferroni's post hoc test  $p^* < 0.05$ ,  $p^{**} < 0.01$ ]. (D) Distance travelled in the open arm of the WAZM was least by the *non-responders* while *responders* and *controls* covered similar distances [Ordinary one-way ANOVA ( $F_{(2,12)} = 7.581$ ,  $p = 0.0074$ ); Bonferroni's post hoc test  $p^* < 0.05$ ,  $p^{**} < 0.01$ ]. (E) Total time spent freezing in the WAZM was highest amongst the *non-responders* but *responders* and *controls* spent similar time freezing [Ordinary one-way ANOVA ( $F_{(2,12)} = 21.15$ ,  $p = 0.0001$ ); Bonferroni's post hoc test  $p^{**} < 0.01$ ,  $p^{***} < 0.0001$ ]. (H) Time spent freezing in the EPM was higher in the *non-responders* than the *controls* [Ordinary one-way ANOVA ( $F_{(2,12)} = 5.293$ ,  $p = 0.0225$ ); Bonferroni's post hoc test  $p^{**} < 0.05$ ,  $p^\# = 0.0663$ ]. A similarly strong trend was also observed between *responders* and *non-responders* (I) Anxiety index in the EPM was higher in the *non-responders* than the *controls*. A similarly strong trend was also observed between *responders* and *non-responders*. [Kruskal-Wallis test ( $H(3) = 9.165$ ,  $p = 0.002$ ); Dunn's post hoc test  $p^{**} < 0.01$ ,  $p^\# = 0.0843$ ] All data represented as mean  $\pm$  SEM. *Controls* ( $n = 5$ ), treatment *responders* ( $n = 6$ ), treatment *non-responders* ( $n = 4$ ).

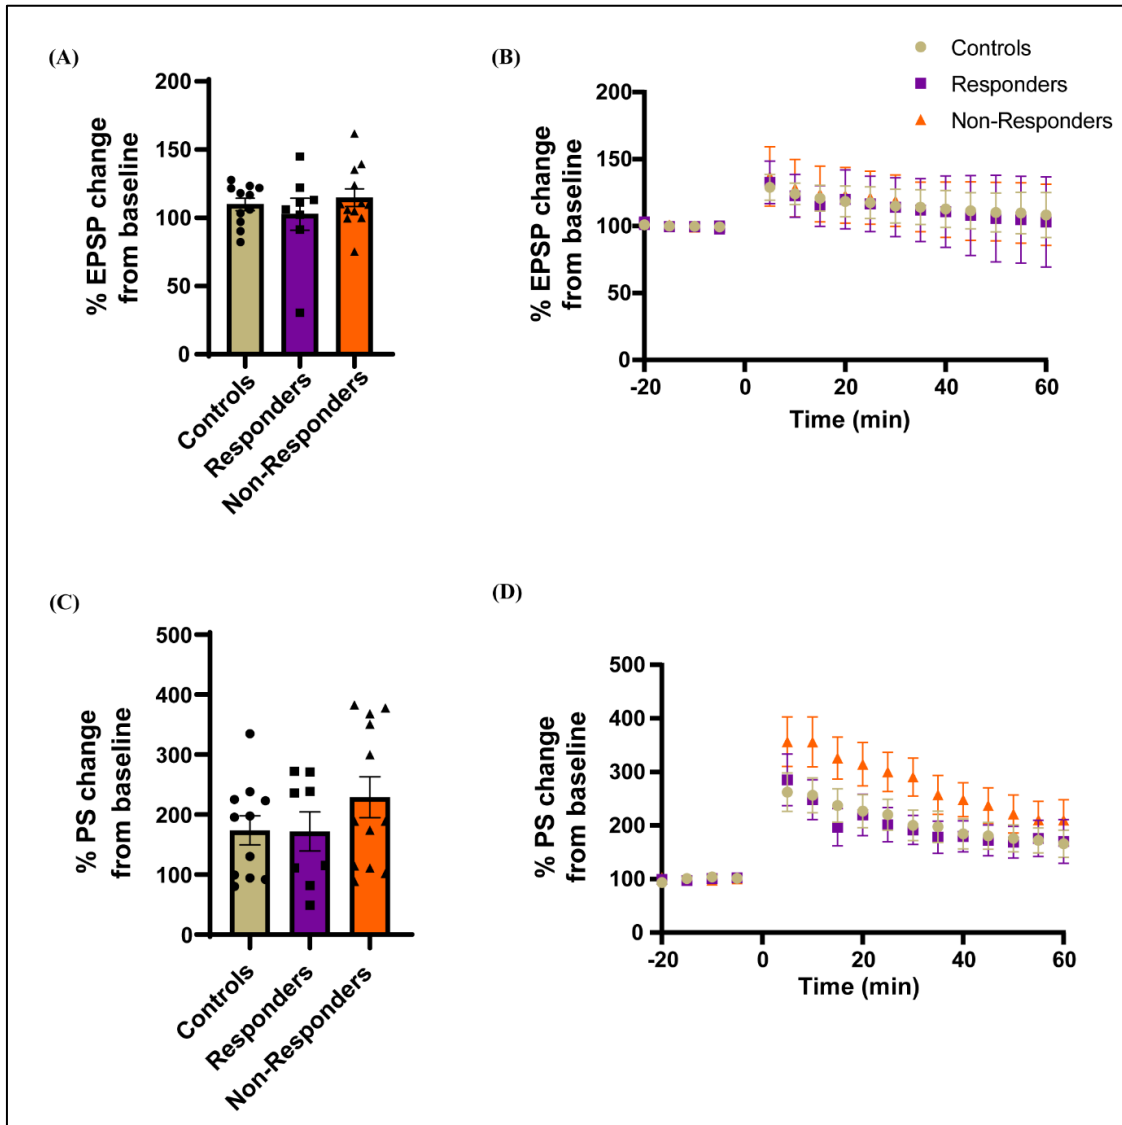

**Supplementary Figure 2.** (A) Sixty minutes following the application of TBS, *controls*, *responders* and *non-responders* showed increase in EPSP slope than baseline levels. (B) However no difference was observed between the groups across time in EPSP slope [2-way repeated measures, interaction effect ( $F_{(22,319)} = 0.8256$ ,  $p = ns$ )] (C) The application of TBS also resulted in an increase in PS amplitude in *controls*, *responders* and *non-responders*. No difference was observed between the groups across time in PS amplitude [2-way repeated measures, interaction effect ( $F_{(22,319)} = 1.443$ ,  $p = ns$ )]. Controls ( $n = 11$ ), responders ( $n = 8$ ), non-responders ( $n = 13$ )
